# Supplementary material for: Synthesis of silver nanoparticles using Fagonia cretica and their antimicrobial activities
Source: Royal Society of Chemistry journal article supplement (doi:10.1039/c8na00343b), 2018-12-04
Supplement: c8na00343b1.pdf [file c8na00343b1.pdf]

| HERBARIUM SHEET                                                                                                                                                                                                                                                                                                                  |  |
|----------------------------------------------------------------------------------------------------------------------------------------------------------------------------------------------------------------------------------------------------------------------------------------------------------------------------------|--|
|                                                                                                                                                                                                                                               |  |
| <p>Voucher: 3401/126</p>                                                                                                                                                                                                                                                                                                         |  |
| <p>NAME <u>Dr. Muhammad Abdullah</u></p>                                                                                                                                                                                                                                                                                         |  |
| <p>COLLEGE <u>Cholistan Institute of desert studies</u> (C-105)<br/><u>The Islamic University of Bahawalpur</u> (IUB)</p>                                                                                                                                                                                                        |  |
| <p>SPECIES <u>Fagonia cretica</u></p>                                                                                                                                                                                                                                                                                            |  |
| <p>FAMILY <u>Zygophyllaceae</u></p>                                                                                                                                                                                                                                                                                              |  |
| <p>HABITAT <u>Clayey saline habitat</u><br/><u>GPS location N: 28° 57.954' E: 365° 45'</u></p>                                                                                                                                                                                                                                   |  |
| <p>LOCALITY <u>Dingakh Fort E: 371° 45.910'</u></p>                                                                                                                                                                                                                                                                              |  |
| <p>DATE <u>19-08-2017</u></p>                                                                                                                                                                                                                                                                                                    |  |
| <p>Teacher's Signature<br/> <br/> <b>Dr. Muhammad Abdullah</b><br/>           Assistant Professor<br/>           Cholistan Institute of Desert Studies (CIDS)<br/>           The Islamic University of Bahawalpur<br/>           Pakistan</p> |  |
| <p>Book Mart Amin Pur Bazar Fsd. 041-2616618</p>                                                                                                                                                                                                                                                                                 |  |

**Certificate 1.** The herbarium certificate for *Fagonia cretica* habitat and existence in Pakistan.
