# Supplementary material for: Synthesis of silver nanoparticles using Fagonia cretica and their antimicrobial activities
Source: Royal Society of Chemistry journal article supplement (doi:10.1039/c8na00343b), 2018-12-04
Supplement: c8na00343b2.pdf [file c8na00343b2.pdf]

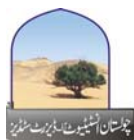

**The Islamia University of Bahawalpur Pakistan**

**Cholistan Institute of Desert Studies (CIDS)**

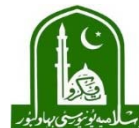

E-mail: [abdullahfrw@gmail.com](mailto:abdullahfrw@gmail.com)  
[abdullahfrw@iub.edu.pk](mailto:abdullahfrw@iub.edu.pk)  
Cell No. +923226228229

Editor-in-Chief  
Nanoscale Advances  
Royal Society of Chemistry.

**Subject:** No Objection Certificate for Adding Voucher No. 3401/126 (Herbarium Certificate) for *Fagonia Cretica*

**Dear Editor,**

I am declaring that I have no objection on addition of above-mentioned voucher number herbarium certificate in the Manuscript entitled “Synthesis of Silver Nanoparticles using *Fagonia Cretica* and their Antimicrobial Activities (DOI: 10.1039/C8NA00343B)” accepted for publication in *Nanoscale Advances*. This certificate is the identification of *Fagonia Cretica* in Pakistan.

Please feel free to contact me if you any queries.

Kind Regards

**Dr. Muhammad Abdullah**

**Dr. Muhammad Abdullah**  
Assistant Professor  
Cholistan Institute of Desert Studies (CIDS)  
The Islamia University of Bahawalpur  
Pakistan
